# Supplementary material
Source: publisher figshare collection journal article supplement (https://karger.figshare.com/ndownloader/files/21677238)
Supplement: Supplementary file 1 [file 21677238]

**e-Table 1.** Codes used for extraction of ophthalmological consultation, optical coherence tomography (OCT), fluorescein (FA) and indocyanine green (ICG) angiographies in the posterior pole, intravitreal injection (IVI), and laser photocoagulation in the posterior pole, in EGB database

| Consultation | CODE PRS_NAT_REF | 1111: consultation quoted C  1112: consultation quoted CS  1113: consultation quoted CNP  1117: consultation of specialists quoted C2 |
| --- | --- | --- |
|  | CODE CAM_PRS_IDE | BZQM001: B-scan ultrasonography of the eye  BZQM002: B-scan ultrasonography and optical biometry of the eyeBFQM001: Optical biometry for IOL calculation  BGQP006: Color stereo fundus photos  BGQP007: Color fundus photos  BGQP009: Blue light fundus photo  BZQK001: Optical coherence tomography  BGQP002: Slit lamp ophthalmoscopy  BGQP003: Ophthalmoloscopy  BGQP140: Deferred grading of fundus photos  BLQP010: Binocular vision  BHQP002: Gonioscopy  BJQP002: Ocular motricity examination  BZQP002: Fluoroscopy  EBQF001: Fluorescein angiography with SLO  EBQF002: Fluorescein angiography with montage  EBQF004: Fluorescein angiography  EBQF005: Indocyanine green angiography  EBQF006: Indocyanine green angiography with SLO |
| Optical coherence tomography (OCT) | CODE CAM_PRS_IDE | BZQK001: Optical coherence tomography |
| FA and ICG angiographies | CODE CAM_PRS_IDE | EBQF001: Fluorescein angiography with SLO  EBQF002: Fluorescein angiography with montage  EBQF004: Fluorescein angiography  EBQF005: Indocyanine green angiography  EBQF006: Indocyanine green angiography with SLO |
| Intravitreal **injection** (IVI) | CODE CAM_PRS_IDE | BGLB001: Intravitreal **injection** |
|  | CODE CAM_PRS_IDE | S01BA01: Dexamethasone  S01LA04: Ranibizumab  S01LA05: Aflibercept  H02AB08: Triamcinolone |
| Laser photocoagulation | CODE CAM_PRS_IDE | BGNP001: Laser photocoagulation in the posterior pole with monochromatic laser  BGNP003: Laser photocoagulation in the fundus with contact lens  BGNP004: Laser photocoagulation in the fundus  BGNP006: Transscleral photocoagulation  BGNP008: Laser photocoagulation in the posterior pole with argon or diode laser |

**e-Table 2.** Yearly rates of eye examinations among adults treated for diabetes (EGB database, 2008-2017)

|  | Age | | | | Gender | | Overall |
| --- | --- | --- | --- | --- | --- | --- | --- |
|  | 18-54 | 55-64 | 65-74 | ≥ 75 | Men | Women |  |
|  | % [95%CI] | % [95%CI] | % [95%CI] | % [95%CI] | % [95%CI] | % [95%CI] | % [95%CI] |
| 2008 | 40.0 [38.3;41.7] | 44.1 [42.6;45.6] | 47.8 [46.3;49.3] | 45.8 [44.2;47.5] | 43.6 [42.5;44.7] | 45.8 [44.7;46.9] | 44.7 [43.4;45.5] |
| 2009 | 40.1 [38.4;41.8] | 44.3 [42.9;45.9] | 48.3 [46.9;49.8] | 48.0 [46.4;49.6] | 44.4 [43.3;45.5] | 46.6 [45.5;47.7] | 45.4 [44.7;46.2] |
| 2010 | 41.0 [39.4;42.7] | 46.1 [44.7;47.5] | 48.8 [47.4;50.2] | 47.2 [45.7;48.7] | 44.5 [43.5;45.5] | 47.9 [46.8;49.0] | 46.1 [45.4;46.8] |
| 2011 | 40.8 [39.2;42.4] | 45.2 [43.9;46.5] | 49.0 [47.7;50.4] | 48.6 [47.9;50.0] | 44.9 [43.9;45.8] | 47.7 [46.6;48.7] | 46.2 [45.5;46.9] |
| 2012 | 40.0 [38.4;41.6] | 46.1 [44.8;47.4] | 49.2 [47.8;50.5] | 49.2 [47.8;50.6] | 45.3 [44.3;46.2] | 48.0 [47.0;49.0] | 46.6 [45.9;47.3] |
| 2013 | 39.9 [38.4;41.5] | 45.3 [44.0;46.6] | 48.8 [47.5;50.1] | 48.7 [47.3;50.1] | 44.6 [43.6;45.5] | 47.9 [47.0;48.9] | 46.2 [45.5;46.8] |
| 2014 | 39.2 [37.7;40.8] | 46.0 [44.7;47.3] | 50.7 [49.4;51.9] | 48.8 [47.5;50.2] | 45.8 [44.8;46.7] | 48.1 [47.1;49.0] | 46.9 [46.2;47.5] |
| 2015 | 40.1 [38.5;41.6] | 46.8 [45.5;48.1] | 49.7 [48.5;50.9] | 49.2 [47.9;50.5] | 45.2 [44.3;46.2] | 49.1 [48.1;50.1] | 47.1 [46.4;47.7] |
| 2016 | 41.8 [40.3;43.4] | 46.7 [45.5;48.0] | 51.6 [50.4;52.7] | 49.5 [47.9;50.4] | 46.8 [45.9;47.7] | 49.4 [48.5;50.4] | 48.0 [47.3;48.6] |
| 2017 | 41.0 [39.5;42.6] | 46.3 [45.0;47.6] | 51.7 [50.5;52.8] | 49.3 [48.0;50.6] | 46.5 [45.6;47.4] | 49.5 [48.6;50.4] | 47.9 [47.3;48.5] |

**e-Table 3.** Biennial rates of eye examinations among adults treated for diabetes (EGB database, 2008-2017)

|  | Age | | | | Gender | | Overall |
| --- | --- | --- | --- | --- | --- | --- | --- |
|  | 18-54 | 55-64 | 65-74 | ≥ 75 | Men | Women |  |
|  | % [95%CI] | % [95%CI] | % [95%CI] | % [95%CI] | % [95%CI] | % [95%CI] | % [95%CI] |
| 2008-2009 | 60.9 [59.2;62.6] | 63.6 [62.1;65.0] | 65.3 [63.9;66.7] | 59.6 [58.0;61.2] | 61.9 [60.8;62.9] | 63.3 [62.2;64.4] | 62.6 [61.8;63.3] |
| 2009-2010 | 60.3 [58.6;62.0] | 64.7 [63.4;66.2] | 65.7 [64.3;67.1] | 61.6 [60.6;63.1] | 62.2 [61.2;63.2] | 64.6 [63.5;65.7] | 63.4 [62.6;64.1] |
| 2010-2011 | 61.9 [60.2;63.5] | 65.5 [64.2;66.9] | 66.3 [64.9;67.6] | 62.1 [60.6;63.5] | 62.9 [61.9;63.9] | 65.6 [64.5;66.6] | 64.2 [63.4;64.9] |
| 2011-2012 | 62.0 [60.4;63.5] | 65.0 [64.8;67.3] | 66.6 [65.3;67.9] | 62.7 [61.4;64.1] | 63.4 [62.4;64.3] | 65.9 [64.9;66.8] | 64.6 [63.9;65.3] |
| 2012-2013 | 61.5 [59.2;63.1] | 65.5 [64.3;66.8] | 66.2 [64.9;67.4] | 63.8 [62.5;65.2] | 63.5 [62.6;64.4] | 65.7 [64.7;66.6] | 64.5 [63.9;65.2] |
| 2013-2014 | 60.3 [58.7;61.8] | 66.0 [64.8;67.2] | 67.4 [66.1;68.6] | 62.5 [61.2;63.8] | 63.4 [62.5;64.3] | 65.6 [64.7;66.6] | 64.5 [63.8;65.1] |
| 2014-2015 | 59.8 [58.3;61.4] | 66.7 [65.5;67.9] | 68.6 [67.4;69.8] | 63.0 [61.7;64.3] | 64.2 [63.3;65.1] | 66.1 [65.1;67.0] | 65.1 [64.4;65.7] |
| 2015-2016 | 62.8 [61.2;64.3] | 67.8 [66.6;69.0] | 68.6 [67.4;69.7] | 64.4 [63.1;65.7] | 64.9 [64.1;65.8] | 67.8 [66.9;68.7] | 66.3 [65.7;66.9] |
| 2016-2017 | 62.5 [61.0;64.0] | 67.6 [66.4;68.8] | 69.6 [69.2;71.3] | 63.2 [61.9;64.4] | 65.3 [64.4;66.1] | 67.6 [66.7;68.5] | 66.4 [65.7;67.0] |

**e-Table 4.** Yearly rate of optical coherence tomography (OCT) imaging, among adults treated for diabetes (EGB database, 2008-2017)

|  | Age | | | | Gender | | Overall |
| --- | --- | --- | --- | --- | --- | --- | --- |
|  | 18-54 | 55-64 | 65-74 | ≥ 75 | Men | Women |  |
|  | % [95%CI] | % [95%CI] | % [95%CI] | % [95%CI] | % [95%CI] | % [95%CI] | % [95%CI] |
| 2008 | 1.5 [1.1;2.0] | 2.5 [2.1;3.0] | 2.9 [2.5;3.5] | 3.7 [3.4;4.7] | 2.4 [2.1;2.7] | 3.0 [2.7;3.5] | 2.7 [3.6;4.2] |
| 2009 | 2.1 [1.6;2.6] | 3.2 [2.7;3.8] | 4.4 [3.8;5.0] | 4.9 [4.2;5.6] | 3.5 [3.2;4.0] | 3.9 [3.5;4.3] | 3.7 [3.4;4.0] |
| 2010 | 3.2 [2.7;3.8] | 3.8 [3.3;4.3] | 4.6 [4.0;5.2] | 6.5 [5.8;7.3] | 4.1 [3.7;4.5] | 5.0 [4.6;5.5] | 4.6 [4.2;4.9] |
| 2011 | 4.2 [3.6;4.9] | 4.6 [4.1;5.2] | 6.5 [5.8;7.2] | 7.5 [6.8;8.3] | 5.6 [5.2;6.1] | 5.9 [5.5;6.4] | 5.8 [5.5;6.1] |
| 2012 | 4.4 [3.7;5.1] | 5.5 [4.9;6.1] | 7.3 [6.6;8.0] | 8.3 [7.6;9.1] | 6.1 [5.6;6.6] | 6.9 [6.4;7.4] | 6.5 [6.1;6.8] |
| 2013 | 5.0 [4.3;5.7] | 6.7 [6.1;7.4] | 8.5 [7.8;9.2] | 10.3 [9.5;11.2] | 7.5 [7.0;8.0] | 8.1 [7.6;8.7] | 7.8 [7.4;8.2] |
| 2014 | 5.0 [4.4;5.7] | 8.0 [7.4;8.8] | 10.2 [9.4;11.0] | 11.9 [11.1;12.8] | 8.8 [8.3;9.4] | 9.4 [8.9;10.0] | 9.1 [8.7;9.5] |
| 2015 | 6.9 [6.2;7.8] | 9.6 [8.9;10.4] | 11.4 [10.6;12.2] | 13.9 [13.0;14.8] | 10.4 [9.9;11.0] | 11.1 [10.5;11.8] | 10.8 [10.3;11.2] |
| 2016 | 8.6 [7.8;9.5] | 11.2 [10.4;12.0] | 14.8 [13.9;15.6] | 16.6 [15.7;17.6] | 13.0 [12.4;13.7] | 13.5 [12.9;14.2] | 13.3 [12.8;13.7] |
| 2017 | 10.5 [9.6;11.5] | 13.9 [13.0;14.8] | 18.2 [17.3;19.1] | 19.7 [18.7;20.7] | 15.4 [14.7;16.0] | 17.2 [16.4;17.8] | 16.2 [15.7;16.7] |

**e-Table 5.** Yearly rate of fluorescein and indocyanin green angiographies, among adults treated for diabetes (EGB database, 2008-2017)

|  | Age | | | | Gender | | Overall |
| --- | --- | --- | --- | --- | --- | --- | --- |
|  | 18-54 | 55-64 | 65-74 | ≥ 75 | Men | Women |  |
|  | % [95%CI] | % [95%CI] | % [95%CI] | % [95%CI] | % [95%CI] | % [95%CI] | % [95%CI] |
| 2008 | 1.9 [1.4;2.3] | 2.4 [2.0;2.9] | 2.4 [2.0;2.9] | 2.8 [2.5;3.6] | 2.3 [2.0;2.7] | 2.4 [2.1;2.8] | 2.4 [2.1;2.6] |
| 2009 | 1.3 [1.0;1.8] | 1.9 [1.6;2.4] | 2.4 [2.0;2.9] | 2.5 [2.1;3.1] | 1.9 [1.6;2.2] | 2.3 [2.0;2.6] | 2.1 [1.9;2.3] |
| 2010 | 1.3 [1.0;1.8] | 1.7 [1.4;2.1] | 1.8 [1.5;2.3] | 2.0 [1.7;2.5] | 1.6 [1.3;1.8] | 2.0 [1.7;2.3] | 1.8 [1.6;2.0] |
| 2011 | 1.2 [0.8;1.6] | 1.4 [1.1;1.8] | 1.6 [1.3;2.0] | 1.9 [1.5;2.5] | 1.6 [1.4;1.9] | 1.5 [1.2;1.7] | 1.6 [1.4;1.7] |
| 2012 | 1.1 [0.8;1.4] | 1.3 [1.0;1.6] | 1.2 [1.0;1.6] | 1.7 [1.4;2.1] | 1.3 [1.1;1.5] | 1.4 [1.2;1.7] | 1.3 [1.2;1.5] |
| 2013 | 0.9 [0.7;1.3] | 1.2 [0.9;1.5] | 1.2 [0.9;1.5] | 1.5 [1.2;1.9] | 1.2 [1.0;1.4] | 1.2 [1.0;1.5] | 1.2 [1.1;1.4] |
| 2014 | 0.9 [0.7;1.3] | 1.1 [0.8;1.4] | 1.4 [1.1;1.7] | 1.4 [1.1;1.8] | 1.1 [0.9;1.3] | 1.3 [1.1;1.6] | 1.2 [1.1;1.3] |
| 2015 | 1.0 [0.7;1.4] | 1.5 [1.2;1.9] | 1.2 [0.9;1.5] | 1.2 [1.0;1.6] | 1.3 [1.1;1.5] | 1.2 [1.0;1.4] | 1.3 [1.1;1.4] |
| 2016 | 1.0 [0.7;1.4] | 1.3 [1.0;1.6] | 1.4 [1.1;1.7] | 1.1 [0.8;1.4] | 1.2 [1.1;1.5] | 1.2 [1.0;1.4] | 1.2 [1.1;1.4] |
| 2017 | 1.3 [1.0;1.7] | 1.3 [1.0;1.6] | 1.4 [1.2;1.7] | 1.3 [1.0;1.6] | 1.3 [1.1;1.5] | 1.3 [1.1;1.6] | 1.3 [1.2;1.5] |

**e-Table 6.** Yearly rate of intravitreal injection (IVI), among adults treated for diabetes (EGB database, 2008-2017)

|  | Age | | | | Gender | | Overall |
| --- | --- | --- | --- | --- | --- | --- | --- |
|  | 18-54 | 55-64 | 65-74 | ≥ 75 | Men | Women |  |
|  | % [95%CI] | % [95%CI] | % [95%CI] | % [95%CI] | % [95%CI] | % [95%CI] | % [95%CI] |
| 2008 | 0.1 [0.0;0.3] | 0.1 [0.1;0.3] | 0.3 [0.2;0.6] | 0.7 [0.5;1.1] | 0.2 [0.1;0.3] | 0.4 [0.3;0.6] | 0.3 [0.2;0.4] |
| 2009 | 0.1 [0.1;0.4] | 0.2 [0.1;0.4] | 0.3 [0.2;0.5] | 0.9 [0.6;1.2] | 0.3 [0.2;0.4] | 0.5 [0.4;0.7] | 0.4 [0.3;0.5] |
| 2010 | 0.1 [0.0;0.3] | 0.3 [0.1;0.4] | 0.5 [0.3;0.7] | 1.0 [0.7;1.3] | 0.4 [0.3;0.5] | 0.6 [0.4;0.8] | 0.5 [0.4;0.6] |
| 2011 | 0.2 [0.1;0.5] | 0.3 [0.2;0.5] | 0.4 [0.3;0.7] | 0.9 [0.7;1.3] | 0.5 [0.3;0.6] | 0.5 [0.4;0.7] | 0.5 [0.4;0.6] |
| 2012 | 0.2 [0.1;0.4] | 0.5 [0.3;0.7] | 0.6 [0.5;0.9] | 1.3 [1.1;1.7] | 0.7 [0.5;0.8] | 0.7 [0.5;0.9] | 0.7 [0.6;0.8] |
| 2013 | 0.2 [0.1;0.3] | 0.5 [0.4;0.7] | 0.9 [0.7;1.1] | 1.6 [1.3;2.0] | 0.8 [0.6;1.0] | 0.9 [0.7;1.0] | 0.8 [0.7;1.0] |
| 2014 | 0.2 [0.1;0.4] | 0.4 [0.3;0.6] | 0.9 [0.7;1.1] | 1.7 [1.4;2.1] | 0.7 [0.6;0.9] | 1.0 [0.8;1.2] | 0.8 [0.7;1.0] |
| 2015 | 0.3 [0.1;0.5] | 0.6 [0.5;0.9] | 0.9 [0.7;1.2] | 1.9 [1.6;2.3] | 0.9 [0.7;1.0] | 1.1 [0.9;1.3] | 1.0 [0.8;1.1] |
| 2016 | 0.6 [0.4;0.9] | 0.9 [0.7;1.2] | 1.3 [1.0;1.6] | 2.0 [1.7;2.4] | 1.1 [0.9;1.3] | 1.5 [0.9;1.3] | 1.3 [1.1;1.4] |
| 2017 | 0.6 [0.4;0.9] | 1.0 [0.8;1.3] | 1.5 [1.2;1.8] | 2.6 [2.2;3.0] | 1.4 [1.2;1.6] | 1.7 [1.4;1.9] | 1.5 [1.4;1.7] |

**e-Table 7.** Yearly rate of laser photocoagulation, among adults treated for diabetes (EGB database, 2008-2017)

|  | Age | | | | Gender | | Overall |
| --- | --- | --- | --- | --- | --- | --- | --- |
|  | 18-54 | 55-64 | 65-74 | ≥ 75 | Men | Women |  |
|  | % [95%CI] | % [95%CI] | % [95%CI] | % [95%CI] | % [95%CI] | % [95%CI] | % [95%CI] |
| 2008 | 1.1 [0.8;1.5] | 1.5 [1.1;1.9] | 1.4 [1.1;1.8] | 1.0 [0.8;1.5] | 1.2 [1.0;1.4] | 1.3 [1.1;1.6] | 1.3 [1.1;1.4] |
| 2009 | 1.0 [0.7;1.4] | 1.1 [0.8;1.4] | 1.2 [0.9;1.6] | 1.3 [1.0;1.7] | 1.1 [0.9;1.4] | 1.2 [1.0;1.4] | 1.2 [1.0;1.3] |
| 2010 | 1.1 [0.8;1.5] | 1.3 [1.0;1.6] | 1.1 [0.9;1.5] | 0.8 [0.6;1.1] | 1.1 [0.9;1.3] | 1.1 [0.9;1.4] | 1.1 [0.9;1.3] |
| 2011 | 1.1 [0.8;1.5] | 1.2 [0.9;1.5] | 1.1 [0.8;1.4] | 0.7 [0.5;0.9] | 0.8 [0.7;1.0] | 1.2 [1.0;1.5] | 1.0 [0.9;1.2] |
| 2012 | 0.8 [0.6;1.2] | 0.8 [0.6;1.1] | 0.9 [0.7;1.2] | 0.8 [0.6;1.1] | 0.8 [0.6;1.0] | 0.9 [0.7;1.1] | 0.8 [0.7;1.0] |
| 2013 | 0.9 [0.6;1.2] | 0.9 [0.7;1.2] | 0.6 [0.4;0.8] | 0.7 [0.5;1.0] | 0.8 [0.6;0.9] | 0.8 [0.6;1.0] | 0.8 [0.7;0.9] |
| 2014 | 0.7 [0.5;1.0] | 0.8 [0.6;1.1] | 0.8 [0.6;1.0] | 0.6 [0.4;0.8] | 0.7 [0.6;0.9] | 0.8 [0.6;0.9] | 0.7 [0.6;0.9] |
| 2015 | 0.8 [0.6;1.1] | 0.8 [0.6;1.1] | 0.8 [0.6;1.1] | 0.7 [0.5;0.9] | 0.7 [0.5;0.9] | 0.9 [0.7;1.1] | 0.8 [0.7;0.9] |
| 2016 | 0.9 [0.7;1.3] | 1.3 [1.0;1.6] | 0.8 [0.6;1.1] | 0.7 [0.5;1.0] | 1.0 [0.8;1.2] | 0.9 [0.7;1.1] | 0.9 [0.8;1.1] |
| 2017 | 1.0 [0.7;1.3] | 0.9 [0.7;1.1] | 1.1 [0.9;1.4] | 0.9 [0.7;1.1] | 1.0 [0.8;1.2] | 0.9 [0.8;1.1] | 1.0 [0.8;1.1] |
